# Supplementary material for: Mist cannon trucks can exacerbate the formation of water-soluble organic aerosol and PM 2.5 pollution in the road environment
Source: Copernicus journal article supplement (doi:10.5194/acp-23-6775-2023), 2023-06-20
Supplement: Supplementary file 1 [file acp-23-6775-2023-supplement.pdf]

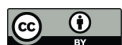

*Supplement of*

## **Mist cannon trucks can exacerbate the formation of water-soluble organic aerosol and PM<sub>2.5</sub> pollution in the road environment**

**Yu Xu et al.**

*Correspondence to:* Hua-Yun Xiao ([xiaohuayun@sjtu.edu.cn](mailto:xiaohuayun@sjtu.edu.cn))

The copyright of individual parts of the supplement might differ from the article licence.

## S1. Parameter Calculation and Compound Categorization

The value of double-bond equivalent (DBE) was calculated to reflect the sum of  $\pi$ -bonds and rings in a neutral molecule (Lechtenfeld et al., 2014; Qiao et al., 2020).

The equation was shown below.

$$\text{DBE} = 1 + N_{\text{C}} - N_{\text{H}}/2 + N_{\text{N}}/2 \quad (1)$$

where the  $N_{\text{C}}$ ,  $N_{\text{H}}$ , and  $N_{\text{N}}$  denote the number of carbon, hydrogen, and nitrogen atoms in a molecular formula, respectively.

The modified aromaticity index ( $\text{AI}_{\text{mod}}$ ) can be used to reflect the aromaticity of organic molecules, which was calculated according to the following equation (Schmidt et al., 2017; Koch and Dittmar, 2006).

$$\text{AI}_{\text{mod}} = (1 + N_{\text{C}} - 0.5 \times N_{\text{O}} - N_{\text{S}} - 0.5 \times N_{\text{N}} - 0.5 \times N_{\text{H}}) / (N_{\text{C}} - 0.5 \times N_{\text{O}} - N_{\text{S}} - N_{\text{N}}) \quad (2)$$

where the  $N_{\text{C}}$ ,  $N_{\text{H}}$ ,  $N_{\text{O}}$ ,  $N_{\text{N}}$ , and  $N_{\text{S}}$  denote the number of carbon, hydrogen, oxygen, nitrogen, and sulfur atoms in a molecular formula, respectively.

The carbon oxidation state ( $\text{OS}_{\text{C}}$ ) is an indicator to describe the evolving composition of aerosol organics undergoing oxidation processes (Kroll et al., 2011).

For assignable molecular formulas,  $\text{OS}_{\text{C}}$  was calculated with following equation.

$$\text{OS}_{\text{C}} \approx 2 \times N_{\text{O}}/N_{\text{C}} - N_{\text{H}}/N_{\text{C}} \quad (3)$$

where the  $N_{\text{C}}$ ,  $N_{\text{H}}$ ,  $N_{\text{O}}$ , and  $N_{\text{N}}$  denote the number of carbon, hydrogen, oxygen, and nitrogen atoms in a molecular formula, respectively. Although the heteroatoms (N, S, and P) can introduce some uncertainties to the  $\text{OS}_{\text{C}}$  value of a given molecule in the measurement of ultrahigh resolution ESI-MS, the influence of these heteroatoms on the  $\text{OS}_{\text{C}}$  value of organic aerosols is generally small (Kroll et al., 2011).

In this study, the molecular formulas of organic molecules were classified into five categories according to the ranges of  $AI_{\text{mod}}$  values and the values of H/C and O/C. Specifically, these categories include unsaturated aliphatic-like (UA) ( $1.5 \leq \text{H/C} < 2.0$ ), highly unsaturated-like (HU) ( $AI_{\text{mod}} \leq 0.5$  and  $\text{H/C} < 1.5$ ), highly aromatic-like (HA) ( $0.5 < AI_{\text{mod}} \leq 0.67$ ), polycyclic aromatic-like (PA) ( $AI_{\text{mod}} > 0.67$ ), and saturated-like (Sa) ( $\text{H/C} \geq 2.0$  or  $\text{O/C} \geq 0.8$ ) molecules (Sihui et al., 2021; Seidel et al., 2014). Considering the presence of isomers for identified formula, the divided categories only represent the compounds containing the most likely functional structure (Butturini et al., 2020; Xie et al., 2021).

## **S2. Aerosol Liquid Water (ALW) Prediction**

The model ISORROPIA-II was used to estimate the mass concentration of ALW with particle-phase concentrations of  $\text{Na}^+$ ,  $\text{NH}_4^+$ ,  $\text{K}^+$ ,  $\text{Ca}^{2+}$ ,  $\text{Mg}^{2+}$ ,  $\text{SO}_4^{2-}$ ,  $\text{NO}_3^-$ , and  $\text{Cl}^-$ , as well as meteorological data (ambient temperature and relative humidity) as inputs (Guo et al., 2015; Nguyen et al., 2016; Tan et al., 2017). In this study, the model was run in the “reverse mode” without inputs of gas-phase parameters (Nguyen et al., 2015; Xu et al., 2020). In addition, the thermodynamically metastable state was set in the subsequent calculation (Guo et al., 2015; Nguyen et al., 2015; Nguyen et al., 2016). The “forward mode” was also run with inputs of only particle-phase ion concentration data, temperature, and relative humidity. The calculation results of water concentrations showed little difference irrespective of the mode used, which is consistent with the previous measurements (Guo et al., 2015; Hennigan et al., 2015).

Aerosol organics typically have complex compositions. It is difficult to directly quantify the mass concentration of water associated with organic fraction (Nguyen et al., 2016; Sareen et al., 2013; Cruz and Pandis, 2000). Accordingly, the mass concentration of water derived from organic compounds was predicted using a simplified model with the Zdanovskii–Stokes–Robinson (ZSR) mixing rule, as suggested by previous studies (Nguyen et al., 2016; Nguyen et al., 2015). Briefly, the hygroscopic growth of aerosol mixtures can be estimated using weighted hygroscopicity of each component according to their dry volume fractions (Bian et al., 2014; Nguyen et al., 2016; Nguyen et al., 2014). The detailed calculation was shown below (Petters and Kreidenweis, 2007; Kreidenweis et al., 2008).

$$V_{w, o} = V_o \kappa_{org} a_w / (1 - a_w) \quad (4)$$

where  $V_{w, o}$  and  $V_o$  are the volumes of water and organics, respectively.  $\kappa_{org}$  is dimensionless and represents the hygroscopicity parameter of the organics.  $a_w$  is dimensionless and indicates water activity. The typical value of  $1.4 \text{ g cm}^{-3}$  for organic density was used to calculate the  $V_o$  value (Davidson et al., 2005; Turpin and Lim, 2001). A  $\kappa_{org}$  value of 0.08 was used in this study, which has been considered as a representative  $\kappa_{org}$  value for urban aerosols (Cerully et al., 2015; Dusek et al., 2010; Gunthe et al., 2009; Nguyen et al., 2016). The  $a_w$  value can be treated as relative humidity to simplify the calculation (Nguyen et al., 2015). This consideration was based on the following assumptions. The effect of aerosol curvature is insignificant. Furthermore, the effect of aerosol water uptake on ambient vapor pressure is also

negligible (Bian et al., 2014). However, this assumption may lead to the overestimation of hygroscopicity (4–11%) (Nguyen et al., 2014).

**Table S1.** The arithmetic and peak-intensity-weighted averages of the elemental ratios and DBE values for different compound subgroups in different PM<sub>2.5</sub> samples.

| PM <sub>2.5</sub> sample          | All compounds       |                     |                      | CHO                 |                     |                     | CHON                |                     |                      |
|-----------------------------------|---------------------|---------------------|----------------------|---------------------|---------------------|---------------------|---------------------|---------------------|----------------------|
|                                   | O/C ± SD            | H/C ± SD            | DBE ± SD             | O/C ± SD            | H/C ± SD            | DBE ± SD            | O/C ± SD            | H/C ± SD            | DBE ± SD             |
|                                   | O/C <sub>w</sub>    | H/C <sub>w</sub>    | DBE <sub>w</sub>     | O/C <sub>w</sub>    | H/C <sub>w</sub>    | DBE <sub>w</sub>    | O/C <sub>w</sub>    | H/C <sub>w</sub>    | DBE <sub>w</sub>     |
| Air spray<br>(March 23)           | 0.52 ± 0.21<br>0.56 | 1.35 ± 0.36<br>1.56 | 6.93 ± 3.33<br>4.51  | 0.46 ± 0.17<br>0.49 | 1.24 ± 0.35<br>1.27 | 7.61 ± 3.19<br>7.04 | 0.49 ± 0.19<br>0.46 | 1.21 ± 0.31<br>1.24 | 8.61 ± 3.17<br>8.22  |
| Ground aspersion<br>(March 23)    | 0.53 ± 0.21<br>0.55 | 1.27 ± 0.41<br>1.56 | 7.44 ± 3.64<br>4.57  | 0.47 ± 0.17<br>0.49 | 1.09 ± 0.38<br>1.05 | 8.45 ± 3.52<br>8.95 | 0.47 ± 0.16<br>0.43 | 1.05 ± 0.31<br>1.13 | 9.79 ± 2.98<br>9.18  |
| Air spray<br>(March 24)           | 0.49 ± 0.2<br>0.52  | 1.33 ± 0.36<br>1.56 | 7.15 ± 3.32<br>4.58  | 0.44 ± 0.17<br>0.47 | 1.21 ± 0.36<br>1.23 | 8.06 ± 3.59<br>7.57 | 0.45 ± 0.17<br>0.42 | 1.20 ± 0.30<br>1.24 | 8.71 ± 2.73<br>8.28  |
| Ground aspersion<br>(March 24)    | 0.55 ± 0.21<br>0.57 | 1.29 ± 0.40<br>1.57 | 7.30 ± 3.61<br>4.45  | 0.48 ± 0.15<br>0.50 | 1.08 ± 0.38<br>1.06 | 9.50 ± 4.13<br>9.21 | 0.50 ± 0.16<br>0.47 | 1.07 ± 0.31<br>1.14 | 9.40 ± 2.79<br>8.88  |
| Air spray<br>(March 25)           | 0.46 ± 0.19<br>0.45 | 1.23 ± 0.41<br>1.48 | 8.36 ± 4.18<br>5.54  | 0.42 ± 0.15<br>0.43 | 1.09 ± 0.40<br>1.07 | 9.57 ± 4.38<br>9.27 | 0.42 ± 0.15<br>0.39 | 1.06 ± 0.33<br>1.10 | 10.47 ± 3.60<br>9.88 |
| Ground aspersion<br>(March 25)    | 0.18 ± 0.21<br>0.57 | 1.25 ± 0.39<br>1.59 | 12.00 ± 3.48<br>4.23 | 0.49 ± 0.17<br>0.52 | 1.14 ± 0.38<br>1.10 | 7.68 ± 3.18<br>8.07 | 0.49 ± 0.16<br>0.46 | 1.07 ± 0.31<br>1.15 | 9.66 ± 3.10<br>8.88  |
| No water spray (I)<br>(March 26)  | 0.55 ± 0.22<br>0.54 | 1.29 ± 0.38<br>1.54 | 7.49 ± 3.69<br>4.79  | 0.47 ± 0.16<br>0.50 | 1.14 ± 0.36<br>1.14 | 8.96 ± 4.14<br>8.54 | 0.51 ± 0.17<br>0.45 | 1.09 ± 0.31<br>1.14 | 9.44 ± 2.97<br>8.97  |
| No water spray (II)<br>(March 26) | 0.52 ± 0.21<br>0.61 | 1.31 ± 0.38<br>1.56 | 7.18 ± 3.37<br>4.47  | 0.47 ± 0.17<br>0.49 | 1.18 ± 0.36<br>1.17 | 8.07 ± 3.45<br>8.09 | 0.48 ± 0.16<br>0.47 | 1.10 ± 0.31<br>1.15 | 9.27 ± 2.88<br>8.83  |

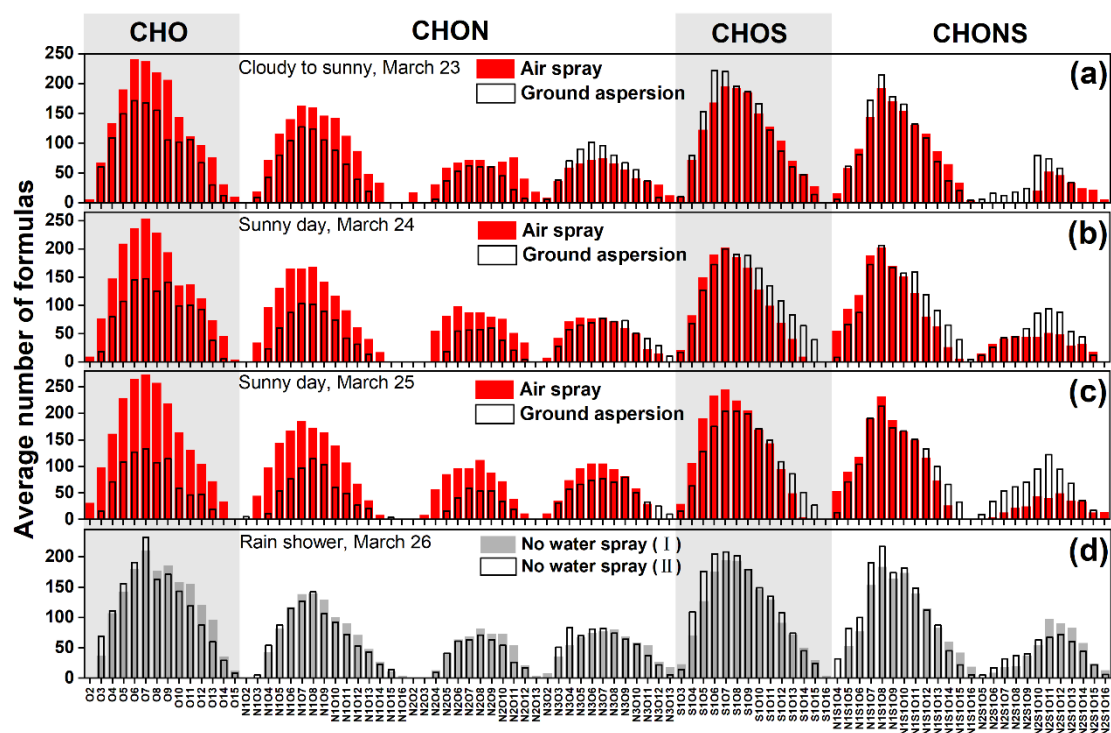

**Figure S1.** Classification of CHO, CHON, CHOS, and CHONS species into subgroups according to the number of O atoms in their molecules in WSOM in PM<sub>2.5</sub> collected from different cases: **(a, b, c)** air spray vs ground aspersion and **(d)** no water spray (I) vs no water spray (II).

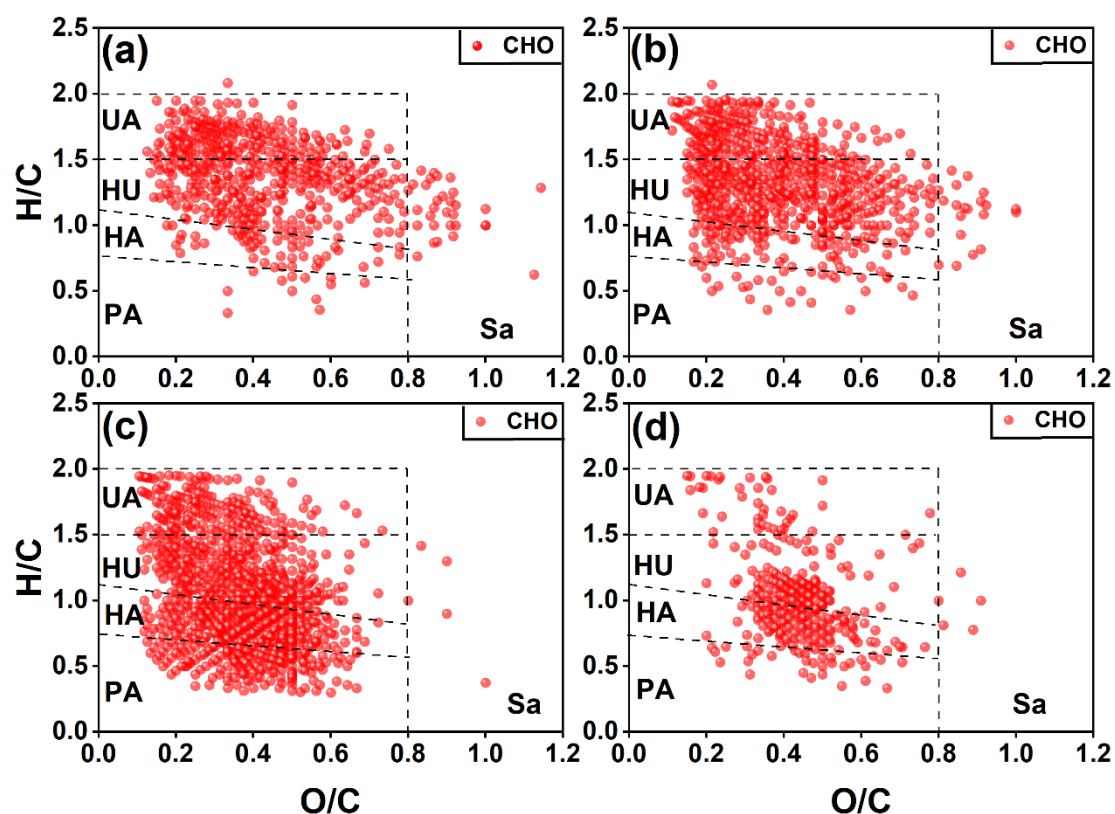

**Figure S2.** Van Krevelen diagrams of unique CHO compounds in WSOM in PM<sub>2.5</sub> collected from different cases: air spray vs ground aspersion on (a) March 23, (b) March 24, and (c) March 25 and two road segments without water spray (I vs II) on (d) March 26. For the above comparative cases, the unique CHO compounds indicate the CHO molecules identified in PM<sub>2.5</sub> collected from the air spray (/no water spray-I) road segments. The classifications of compounds include unsaturated aliphatic-like (UA), highly unsaturated-like (HU), highly aromatic-like (HA), polycyclic aromatic-like (PA), and saturated-like (Sa) molecules.



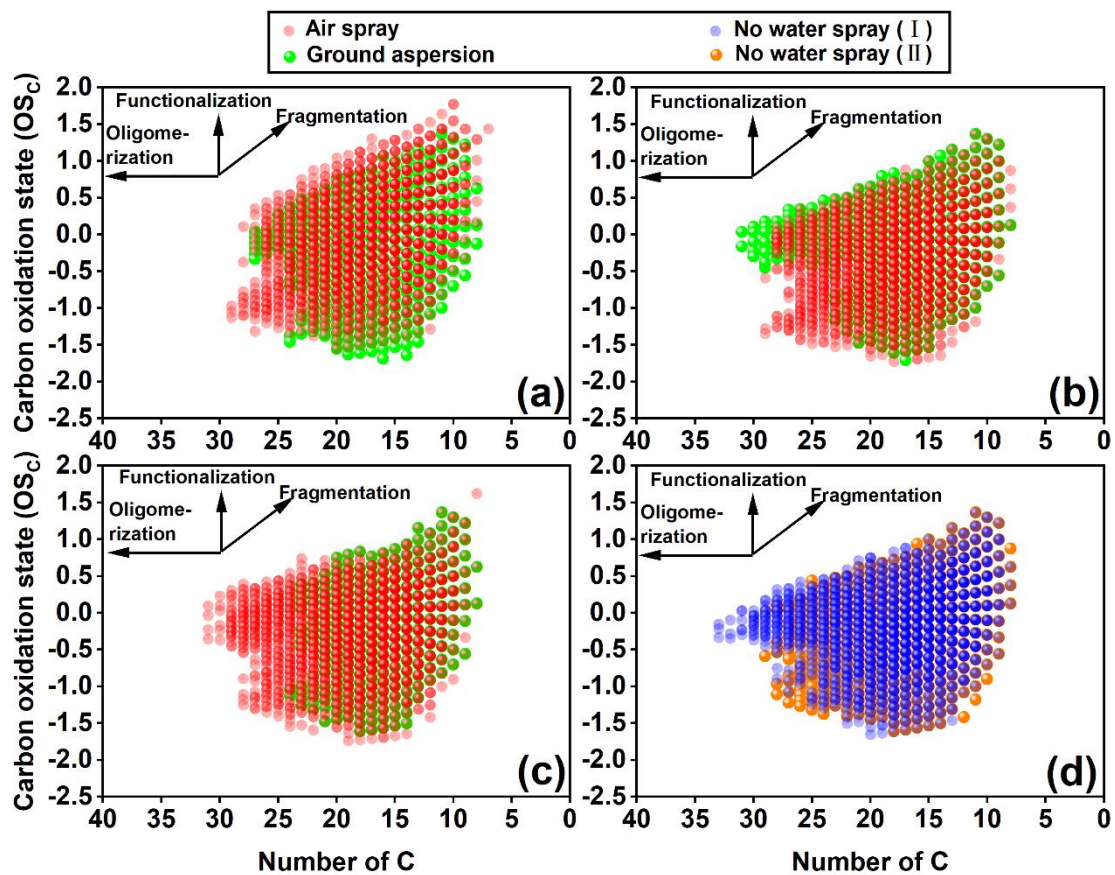

**Figure S3.**  $OS_C$  of each CHO molecule in WSOM in  $PM_{2.5}$  collected from different cases: air spray vs ground aspersion on (a) March 23, (b) March 24, and (c) March 25 and no water spray (I) vs no water spray (II) on (d) March 26.

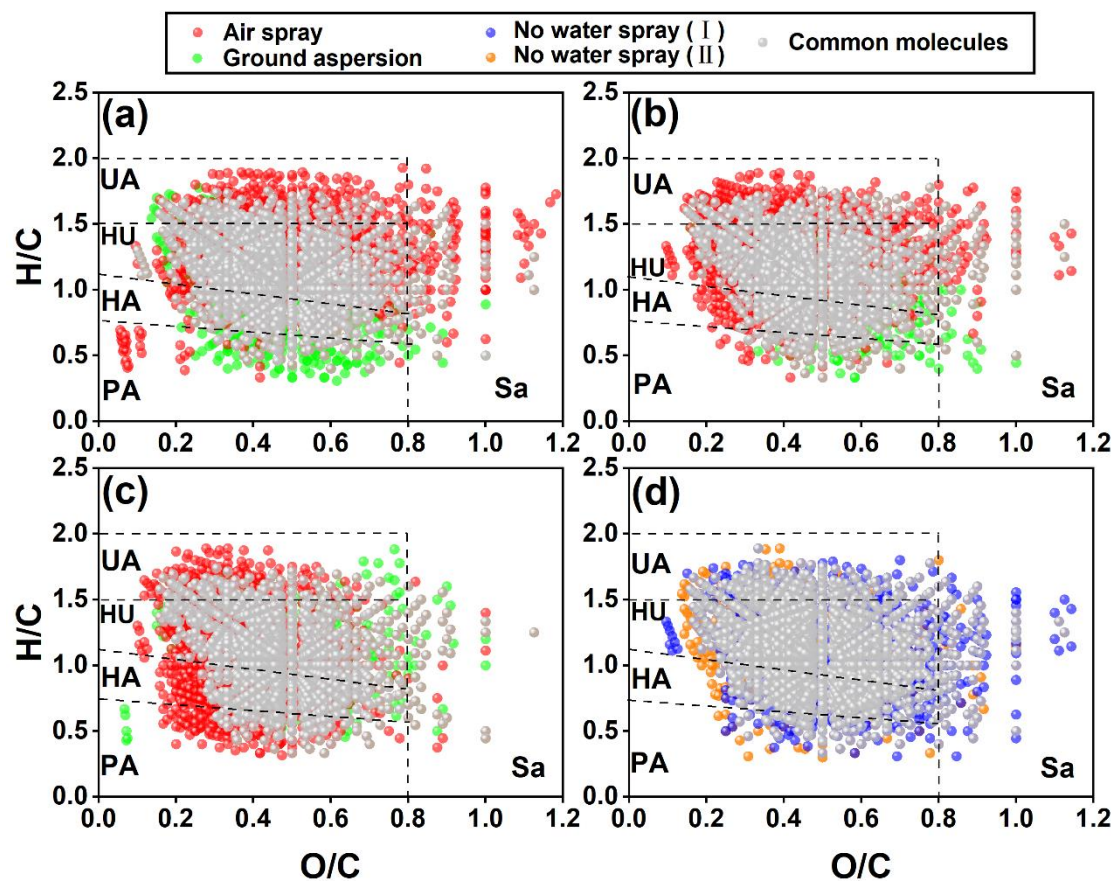

**Figure S4.** Van Krevelen diagrams of CHON compounds in WSOM in PM<sub>2.5</sub> collected from different cases: air spray vs ground aspersion on (a) March 23, (b) March 24, and (c) March 25 and two road segments without water spray (I vs II) on (d) March 26. The classifications of compounds include unsaturated aliphatic-like (UA), highly unsaturated-like (HU), highly aromatic-like (HA), polycyclic aromatic-like (PA), and saturated-like (Sa) molecules.

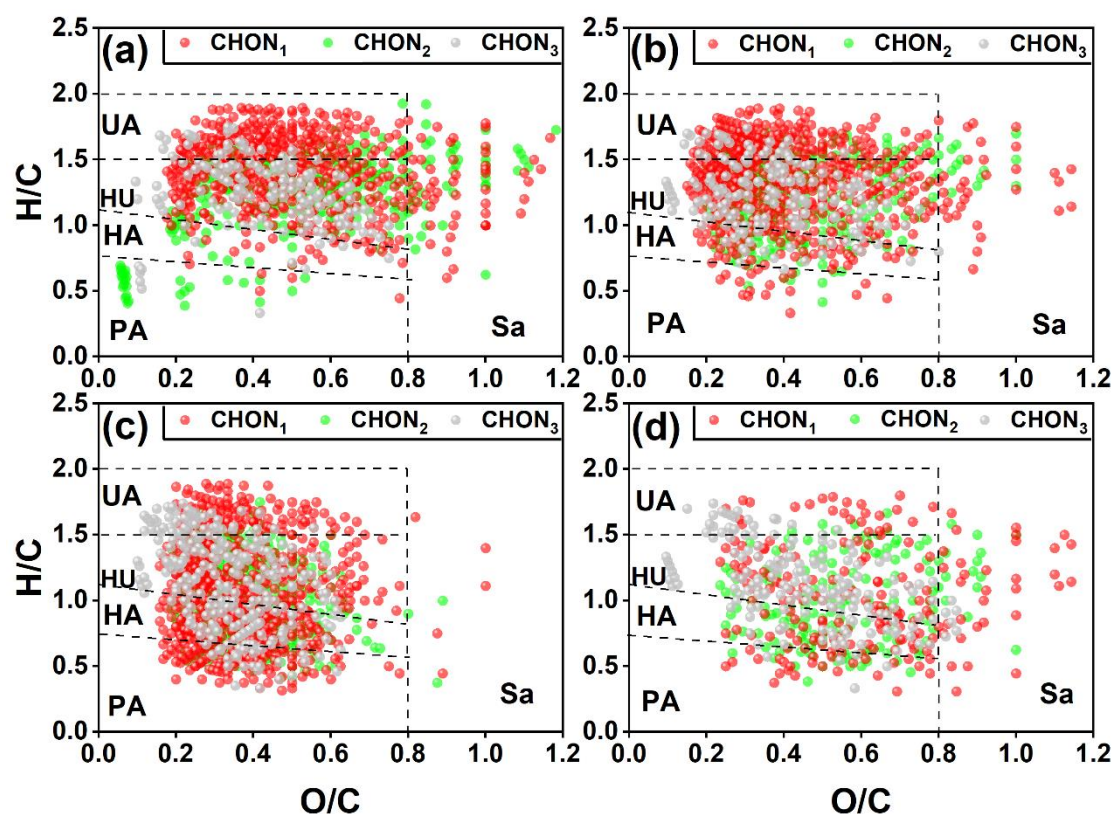

**Figure S5.** Van Krevelen diagrams of unique CHON compounds in WSOM in PM<sub>2.5</sub> collected from different cases: air spray vs ground aspersion on (a) March 23, (b) March 24, and (c) March 25 and two road segments without water spray (I vs II) on (d) March 26. For the above comparative cases, the unique CHON compounds indicate the CHON molecules identified in PM<sub>2.5</sub> collected from the air spray (/no water spray-I) road segments. The classifications of compounds include unsaturated aliphatic-like (UA), highly unsaturated-like (HU), highly aromatic-like (HA), polycyclic aromatic-like (PA), and saturated-like (Sa) molecules.

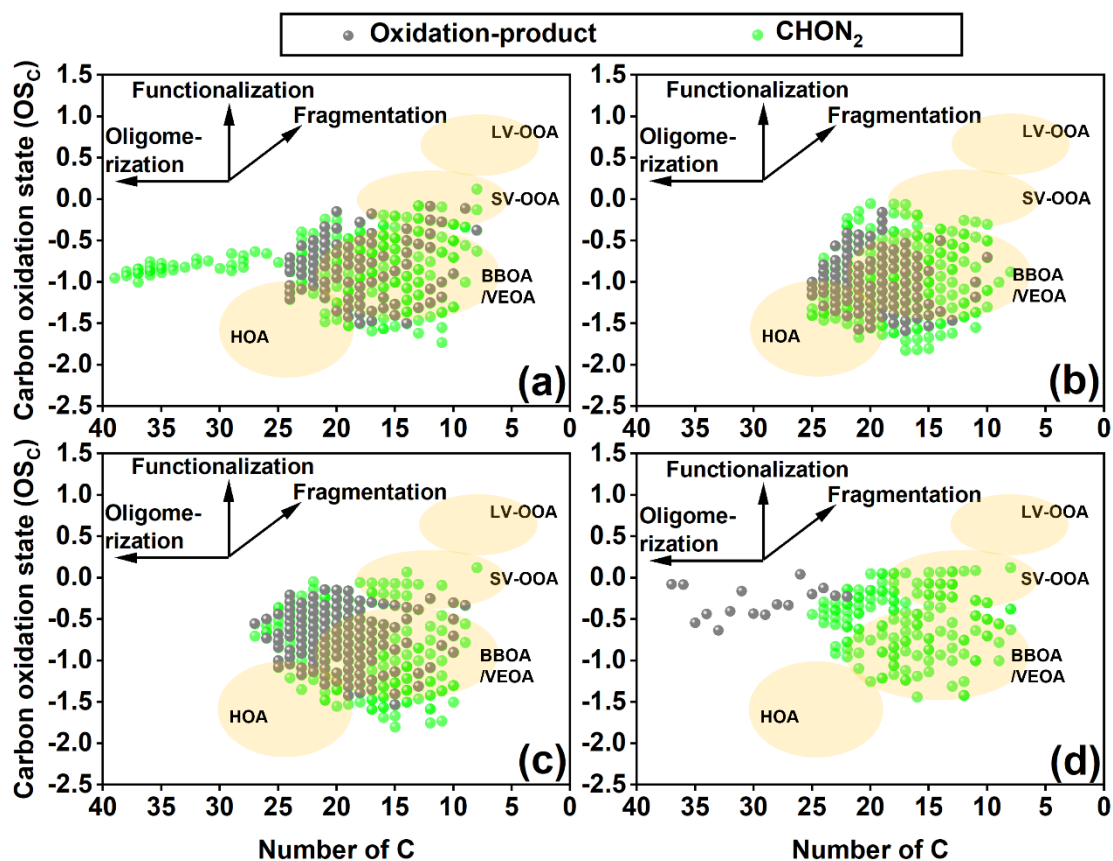

**Figure S6.**  $OS_C$  of unique  $CHON_2$  molecules in WSOM in  $PM_{2.5}$  collected from different cases: air spray vs ground aspersion on (a) March 23, (b) March 24, and (c) March 25 and two road segments without water spray (I vs II) on (d) March 26. For the above comparative cases, the unique  $CHON_2$  compounds indicate the  $CHON_2$  molecules identified in  $PM_{2.5}$  collected from the air spray (/no water spray-I) road segments. The light orange background indicates areas of HOA (hydrocarbon-like organic aerosol), BBOA and VEOA (biomass burning and vehicle emission organic aerosols) (Kroll et al., 2011; Tong et al., 2016), SV-OOA (semivolatile oxidized organic aerosol), and LV-OOA (low-volatility oxidized organic aerosol) (Kroll et al., 2011). The grey circles refer to the identified oxidation-product pairs.

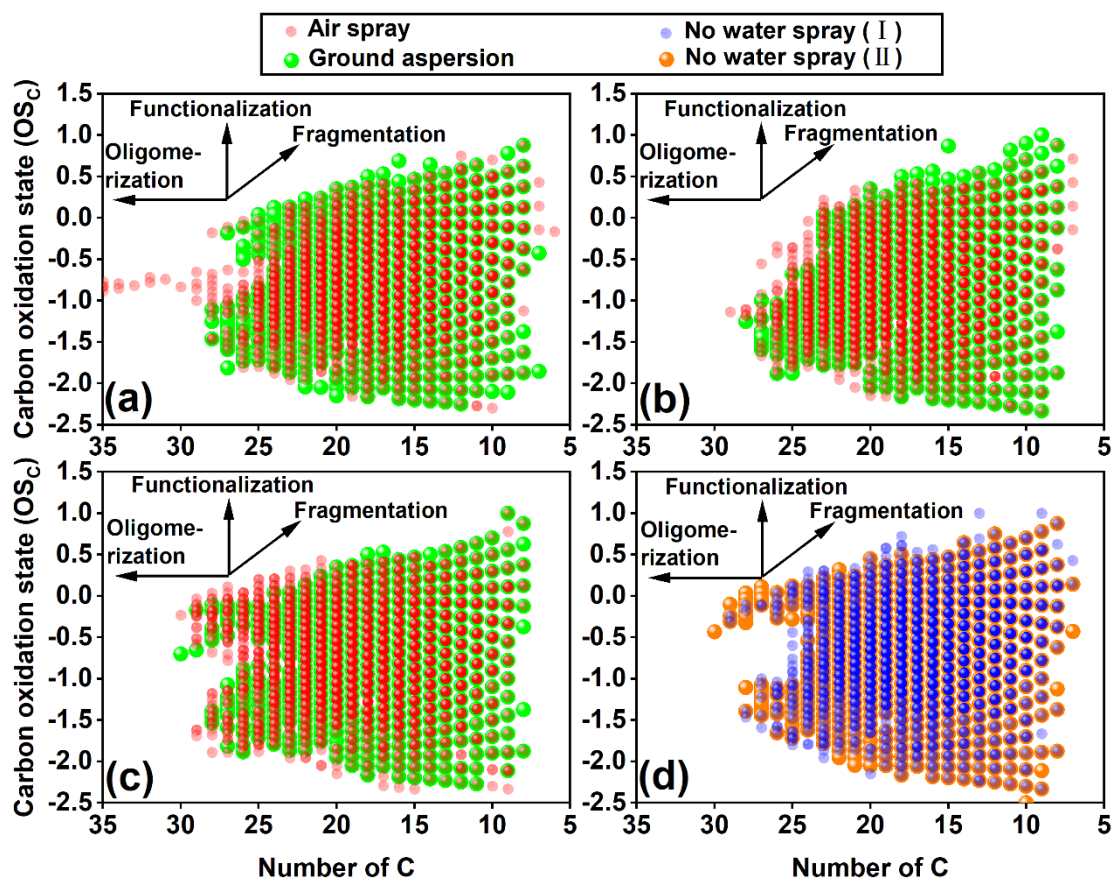

**Figure S7.**  $OS_C$  of each CHON molecule in WSOM in  $PM_{2.5}$  collected from different cases: air spray vs ground aspersion on (a) March 23, (b) March 24, and (c) March 25 and no water spray (I) vs no water spray (II) on (d) March 26.

## References.

- Bian, Y., Zhao, C., Ma, N., Chen, J., and Xu, W.: A study of aerosol liquid water content based on hygroscopicity measurements at high relative humidity in the North China Plain, *Atmos. Chem. Phys.*, 14, 6417-6426. <https://doi.org/6410.5194/acp-6414-6417-2014>, 2014.
- Butturini, A., Herzsprung, P., Lechtenfeld, O. J., Venturi, S., Amalfitano, S., Vazquez, E., Pacini, N., Harper, D. M., Tassi, F., and Fazi, S.: Dissolved organic matter in a tropical saline-alkaline lake of the East African Rift Valley, *Water Res.*, 173, 115532, <https://doi.org/10.1016/j.watres.2020.115532>, 2020.
- Cerully, K., Bougiatioti, A., Hite Jr, J., Guo, H., Xu, L., Ng, N., Weber, R., and Nenes, A.: On the link between hygroscopicity, volatility, and oxidation state of ambient and water-soluble aerosols in the southeastern United States, *Atmos. Chem. Phys.*, 15, 8679-8694. <https://doi.org/8610.5194/acp-8615-8679-2015>, 2015.
- Cruz, C. N. and Pandis, S. N.: Deliquescence and hygroscopic growth of mixed inorganic– organic atmospheric aerosol, *Environ. Sci. Technol.*, 34, 4313-4319. <https://doi.org/4310.1021/es9907109>, 2000.
- Davidson, C. I., Phalen, R. F., and Solomon, P. A.: Airborne Particulate Matter and Human Health: A Review, *Aerosol Sci. Technol.*, 39, 737-749. <https://doi.org/710.1080/02786820500191348>, 2005.
- Dusek, U., Frank, G., Curtius, J., Drewnick, F., Schneider, J., Kürten, A., Rose, D., Andreae, M. O., Borrmann, S., and Pöschl, U.: Enhanced organic mass fraction

- and decreased hygroscopicity of cloud condensation nuclei (CCN) during new particle formation events, *Geophys. Res. Lett.*, **37**, 3. <https://doi.org/10.1029/2009GL040930>, 2010.
- Gunthe, S., King, S., Rose, D., Chen, Q., Roldin, P., Farmer, D., Jimenez, J., Artaxo, P., Andreae, M., and Martin, S.: Cloud condensation nuclei in pristine tropical rainforest air of Amazonia: size-resolved measurements and modeling of atmospheric aerosol composition and CCN activity, *Atmos. Chem. Phys.*, **9**, 7551-7575. <https://doi.org/7510.5194/acp-7559-7551-2009>, 2009.
- Guo, H. Y., Xu, L., Bougiatioti, A., Cerully, K. M., Capps, S. L., Hite Jr, J., Carlton, A., Lee, S. H., Bergin, M., and Ng, N.: Fine-particle water and pH in the southeastern United States, *Atmos. Chem. Phys.*, **15**, 5211-5228. <https://doi.org/5210.5194/acp-5215-5211-2015>, 2015.
- Hennigan, C., Izumi, J., Sullivan, A., Weber, R., and Nenes, A.: A critical evaluation of proxy methods used to estimate the acidity of atmospheric particles, *Atmos. Chem. Phys.*, **15**, 2775-2790. <https://doi.org/2710.5194/acp-2715-2775-2015>, 2015.
- Koch, B. P. and Dittmar, T.: From mass to structure: an aromaticity index for high-resolution mass data of natural organic matter, *Rapid Commun. Mass Spectrom.*, **20**, 926-932, <https://doi.org/10.1002/rcm.2386>, 2006.
- Kreidenweis, S., Petters, M., and DeMott, P.: Single-parameter estimates of aerosol water content, *Environ. Res. Lett.*, **3**, 035002. DOI: 035010.031088/031748-039326/035003/035003/035002, 2008.

Kroll, J. H., Donahue, N. M., Jimenez, J. L., Kessler, S. H., Canagaratna, M. R., Wilson, K. R., Altieri, K. E., Mazzoleni, L. R., Wozniak, A. S., Bluhm, H., Mysak, E. R., Smith, J. D., Kolb, C. E., and Worsnop, D. R.: Carbon oxidation state as a metric for describing the chemistry of atmospheric organic aerosol, *Nat. Chem.*, 3, 133-139, [10.1038/nchem.948](https://doi.org/10.1038/nchem.948), 2011.

Lechtenfeld, O. J., Kattner, G., Flerus, R., Mccallister, S. L., Schmitt-Kopplin, P., and Koch, B. P.: Molecular transformation and degradation of refractory dissolved organic matter in the Atlantic and Southern Ocean, *Geochim. Cosmochim. Ac.*, 126, 321-337. <https://doi.org/310.1016/j.gca.2013.1011.1009>, 2014.

Nguyen, T. K. V., Capps, S. L., and Carlton, A. G.: Decreasing Aerosol Water Is Consistent with OC Trends in the Southeast U.S, *Environ. Sci. Technol.*, 49, 7843-7850. <https://doi.org/7810.1021/acs.est.7845b00828>, 2015.

Nguyen, T. K. V., Zhang, Q., Jimenez, J. L., Pike, M., and Carlton, A. G.: Liquid water: ubiquitous contributor to aerosol mass, *Environ. Sci. Tech. Let.*, 3, 257-263. <https://doi.org/210.1021/acs.estlett.1026b00167>, 2016.

Nguyen, T. K. V., Petters, M., Suda, S., Guo, H., Weber, R., and Carlton, A.: Trends in particle-phase liquid water during the Southern Oxidant and Aerosol Study, *Atmos. Chem. Phys.*, 14, 10911-10930. <https://doi.org/10910.15194/acp-10914-10911-12014>, 2014.

Petters, M. and Kreidenweis, S.: A single parameter representation of hygroscopic growth and cloud condensation nucleus activity, *Atmos. Chem. Phys.*, 7, 1961-1971. <https://doi.org/1910.5194/acp-1967-1961-2007>, 2007.



- Qiao, W., Guo, H., He, C., Shi, Q., Xiu, W., and Zhao, B.: Molecular Evidence of Arsenic Mobility Linked to Biodegradable Organic Matter, *Environ. Sci. Technol.*, 54, 7280-7290. <https://doi.org/7210.1021/acs.est.7280c00737>, 2020.
- Sareen, N., Schwier, A., Lathem, T., Nenes, A., and McNeill, V. F.: Surfactants from the gas phase may promote cloud droplet formation, *P. Natl. Acad. Sci. U. S. A.*, 110, 2723-2728. <https://doi.org/2710.1073/pnas.1204838110>, 2013.
- Schmidt, F., Koch, B. P., Goldhammer, T., Elvert, M., Witt, M., Lin, Y.-S., Wendt, J., Zabel, M., Heuer, V. B., and Hinrichs, K.-U.: Unraveling signatures of biogeochemical processes and the depositional setting in the molecular composition of pore water DOM across different marine environments, *Geochim. Cosmochim. Ac.*, 207, 57-80. <https://doi.org/10.1016/j.gca.2017.1003.1005>, 2017.
- Seidel, M., Beck, M., Riedel, T., Waska, H., Suryaputra, I. G. N. A., Schnetger, B., Niggemann, J., Simon, M., and Dittmar, T.: Biogeochemistry of dissolved organic matter in an anoxic intertidal creek bank, *Geochim. Cosmochim. Ac.*, 140, 418-434, <https://doi.org/10.1016/j.gca.2014.05.038>, 2014.
- Sihui, S., Xie, Q., Lang, Y., Cao, D., Xu, Y., Chen, J., Chen, S., Hu, W., Qi, Y., Pan, X., Sun, Y., Wang, Z., Liu, C.-Q., Jiang, G., and Fu, P.: High Molecular Diversity of Organic Nitrogen in Urban Snow in North China, *Environ. Sci. Technol.*, 10.1021/acs.est.0c06851, 2021.
- Tan, H., Cai, M., Fan, Q., Liu, L., Li, F., Chan, P. W., Deng, X., and Wu, D.: An analysis of aerosol liquid water content and related impact factors in Pearl River Delta,

Sci. Total Environ., 579, 1822-1830.

<https://doi.org/10.1016/j.scitotenv.2016.1811.1167>, 2017.

Tong, H., Kourtchev, I., Pant, P., Keyte, I., O'Connor, I. P., Wenger, J., Pope, F., Harrison, R., and Kalberer, M.: Molecular composition of organic aerosols at urban background and road tunnel sites using ultra-high resolution mass spectrometry, *Faraday Discuss.*, 189, 51-68, 10.17863/CAM.5910, 2016.

Turpin, B. J. and Lim, H.-J.: Species Contributions to PM<sub>2.5</sub> Mass Concentrations: Revisiting Common Assumptions for Estimating Organic Mass, *Aerosol Sci. Technol.*, 35, 602-610. DOI: 610.1080/02786820119445, 2001.

Xie, Q., Sihui, S., Chen, J., Dai, Y., Yue, S., Su, H., Tong, H., Zhao, W., Ren, L., Xu, Y., Cao, D., Li, Y., Sun, Y., Wang, Z., Liu, C.-Q., Kawamura, K., Jiang, G., Cheng, Y., and Fu, P.: Increase of nitrooxy organosulfates in firework-related urban aerosols during Chinese New Year's Eve, *Atmos. Chem. Phys.*, 21, 11453-11465, 10.5194/acp-21-11453-2021, 2021.

Xu, Y., Miyazaki, Y., Tachibana, E., Sato, K., Ramasamy, S., Mochizuki, T., Sadanaga, Y., Nakashima, Y., Sakamoto, Y., Matsuda, K., and Kajii, Y.: Aerosol Liquid Water Promotes the Formation of Water-Soluble Organic Nitrogen in Submicrometer Aerosols in a Suburban Forest, *Environ. Sci. Technol.*, 54, 1406-1414. <https://doi.org/10.1021/acs.est.1409b05849>, 2020.
